# Supplementary material for: Metal-free polycyclotrimerization of trimethylsilyl-protected diynes: a facile strategy toward regioregular hyperbranched polyarylenes
Source: Royal Society of Chemistry journal article supplement (doi:10.1039/d3py00249g), 2023-01-01
Supplement: d3py00249g1.pdf [file d3py00249g1.pdf]

*Electronic Supplementary Information*

**Metal-free polycyclotrimerization of trimethylsilyl-protected diynes:  
a facile strategy toward regioregular hyperbranched polyarylenes**

Lu Wang,<sup>‡a</sup> Yongliang Zhan,<sup>‡a</sup> Linhui Zhang,<sup>a</sup> and Hongkun Li,<sup>\*a</sup>

<sup>a</sup>Laboratory of Advanced Optoelectronic Materials, Suzhou Key Laboratory of Novel Semiconductor-Optoelectronics Materials and Devices, State and Local Joint Engineering Laboratory for Novel Functional Polymeric Materials, Jiangsu Engineering Laboratory of Novel Functional Polymeric Materials, College of Chemistry, Chemical Engineering and Materials Science, Soochow University, Suzhou, 215123, China. E-mail: [hkli@suda.edu.cn](mailto:hkli@suda.edu.cn)

<sup>‡</sup>L. Wang and Y. Zhan contributed equally to this work.

**Table of Contents**

**Scheme S1.** Synthetic route to monomer **1c**

**Scheme S2.** Synthetic route to model compound **5**

**Scheme S3.** Synthetic route to model compound **8**

**Fig. S1** <sup>1</sup>H NMR spectrum of intermediate compound **2** in DMSO-*d*<sub>6</sub> without TMS. The solvent and water peaks are marked with asterisks.

**Fig. S2** <sup>13</sup>C NMR spectra of intermediate compound **2** in DMSO-*d*<sub>6</sub> without TMS. The solvent peaks are marked with asterisks.

**Fig. S3** <sup>1</sup>H NMR spectrum of intermediate compound **3** in CDCl<sub>3</sub>. The solvent and water peaks are marked with asterisks.

**Fig. S4** <sup>13</sup>C NMR spectra of intermediate compound **3** in CDCl<sub>3</sub>. The solvent peaks are marked with asterisks.

**Fig. S5** <sup>1</sup>H NMR spectra of compound **4** in CDCl<sub>3</sub>. The solvent and water peaks are marked with asterisks.

**Fig. S6** <sup>13</sup>C NMR spectra of compound **4** in CDCl<sub>3</sub>. The solvent peaks are marked with asterisks.

**Fig. S7** IR spectra of model compound **5**.

**Fig. S8**  $^{13}\text{C}$  NMR spectra of model compound **5** in  $\text{CD}_2\text{Cl}_2$  without TMS. The solvent peaks are marked with asterisks.

**Fig. S9** IR spectra of model compound **8**.

**Fig. S10**  $^{13}\text{C}$  NMR spectra of model compound **8** in  $\text{CD}_2\text{Cl}_2$  without TMS. The solvent peaks are marked with asterisks.

**Fig. S11** IR spectra of monomer **1b** (A) and its polymer *hb-P1b* (B).

**Fig. S12** IR spectra of monomer **1c** (A) and its polymer *hb-P1c* (B).

**Fig. S13** IR spectra of monomer **1d** (A) and its polymer *hb-P1d* (B).

**Fig. S14** IR spectra of monomer **1e** (A) and its polymer *hb-P1e* (B).

**Fig. S15**  $^1\text{H}$  NMR spectra of monomer **1b** (A) and polymer *hb-P1b* (B) in  $\text{CD}_2\text{Cl}_2$  without TMS. The solvent and water peaks are marked with asterisks.

**Fig. S16**  $^1\text{H}$  NMR spectra of monomer **1c** (A) and polymer *hb-P1c* (B) in  $\text{CD}_2\text{Cl}_2$  without TMS. The solvent and water peaks are marked with asterisks.

**Fig. S17**  $^1\text{H}$  NMR spectra of monomer **1d** (A) and polymer *hb-P1d* (B) in  $\text{CD}_2\text{Cl}_2$  without TMS. The solvent and water peaks are marked with asterisks.

**Fig. S18**  $^1\text{H}$  NMR spectra of monomer **1e** (A) and polymer *hb-P1e* (B) in  $\text{CD}_2\text{Cl}_2$  without TMS. The solvent and water peaks are marked with asterisks.

**Fig. S19**  $^{13}\text{C}$  NMR spectra of monomer **1b** (A) and polymer *hb-P1b* (B) in  $\text{CD}_2\text{Cl}_2$  without TMS. The solvent peaks are marked with asterisks.

**Fig. S20**  $^{13}\text{C}$  NMR spectra of monomer **1c** (A) and polymer *hb-P1c* (B) in  $\text{CD}_2\text{Cl}_2$  without TMS. The solvent peaks are marked with asterisks.

**Fig. S21**  $^{13}\text{C}$  NMR spectra of monomer **1d** (A) and polymer *hb-P1d* (B) in  $\text{CD}_2\text{Cl}_2$  without TMS. The solvent peaks are marked with asterisks.

**Fig. S22**  $^{13}\text{C}$  NMR spectra of monomer **1e** (A) and polymer *hb-P1e* (B) in  $\text{CD}_2\text{Cl}_2$  without TMS. The solvent peaks are marked with asterisks.

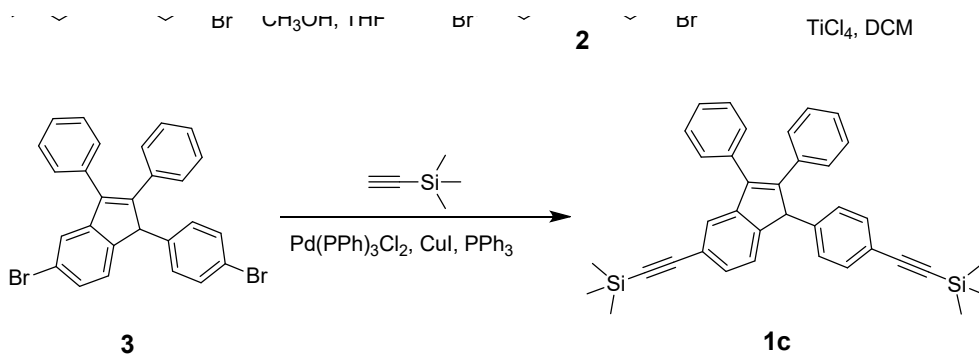

**Scheme S1** Synthetic route to monomer **1c**

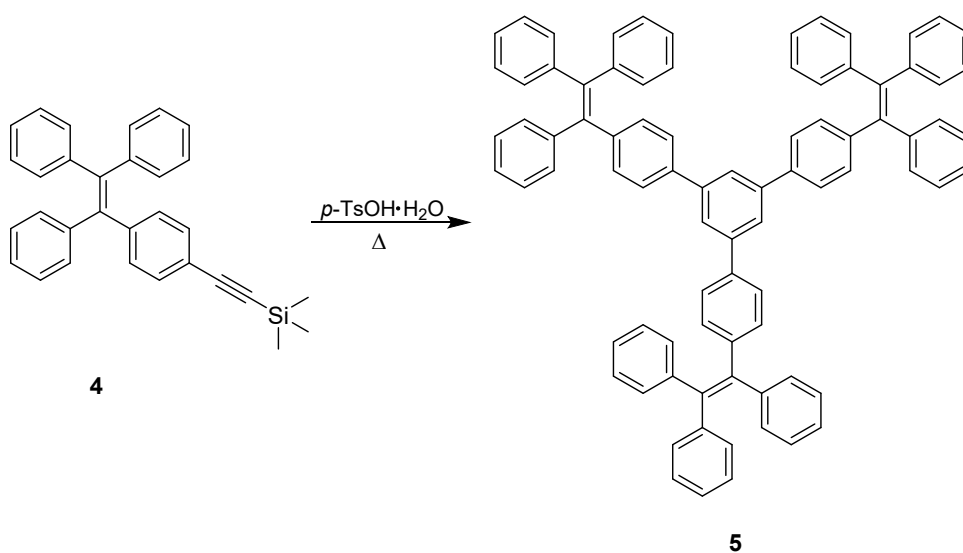

**Scheme S2** Synthetic route to model compound **5**

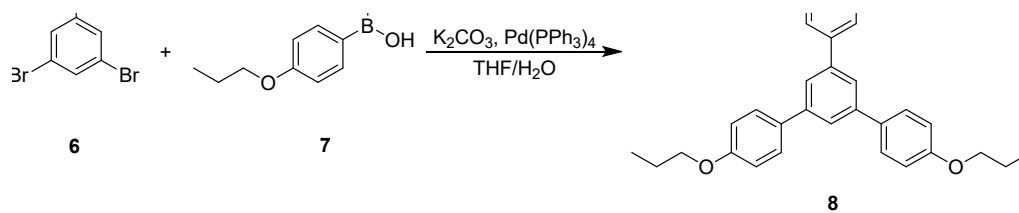

**Scheme S3** Synthetic route to model compound **8**

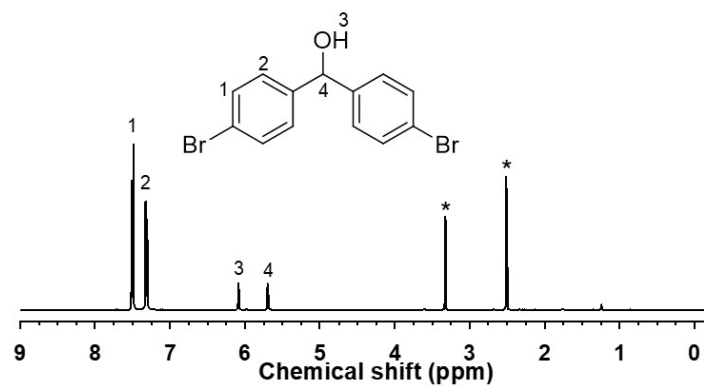

**Fig. S1**  $^1\text{H}$  NMR spectra of intermediate compound **2** in  $\text{DMSO-}d_6$  without TMS. The solvent and water peaks are marked with asterisks.

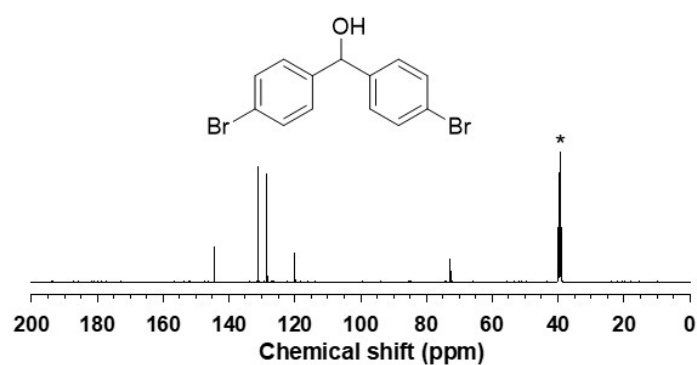

**Fig. S2**  $^{13}\text{C}$  NMR spectra of intermediate compound **2** in  $\text{DMSO-}d_6$  without TMS. The solvent peaks are marked with asterisks.

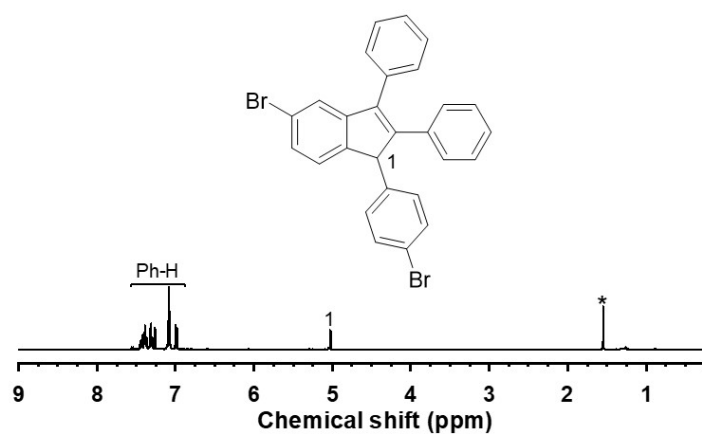

**Fig. S3**  $^1\text{H}$  NMR spectra of intermediate compound **3** in  $\text{CDCl}_3$ . The solvent and water peaks are marked with asterisks.

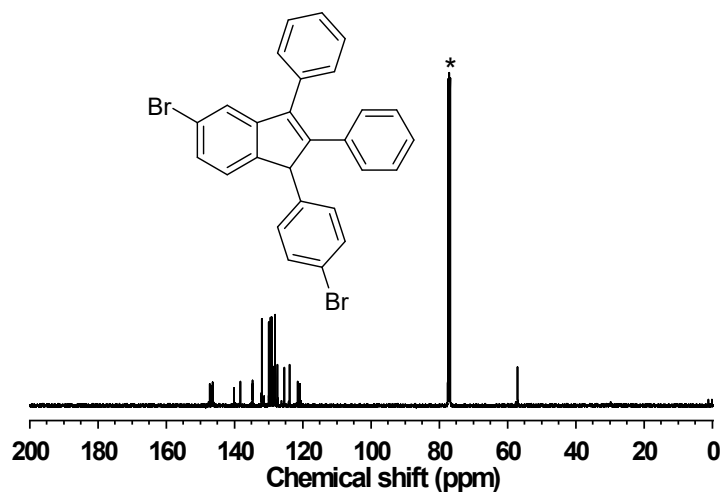

**Fig. S4**  $^{13}\text{C}$  NMR spectra of intermediate compound **3** in  $\text{CDCl}_3$ . The solvent peaks are marked with asterisks.

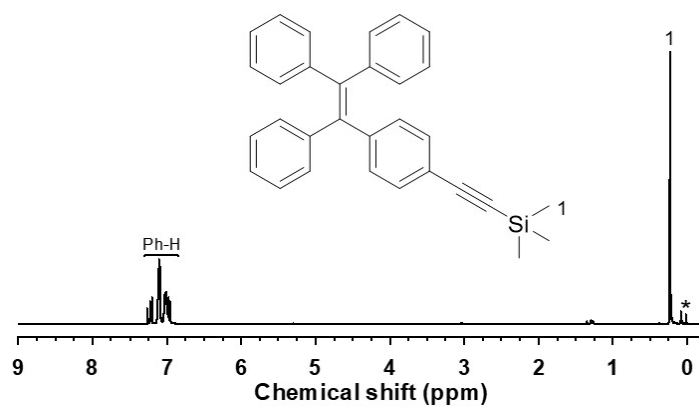

**Fig. S5**  $^1\text{H}$  NMR spectra of compound **4** in  $\text{CDCl}_3$ . The solvent and water peaks are marked with asterisks.

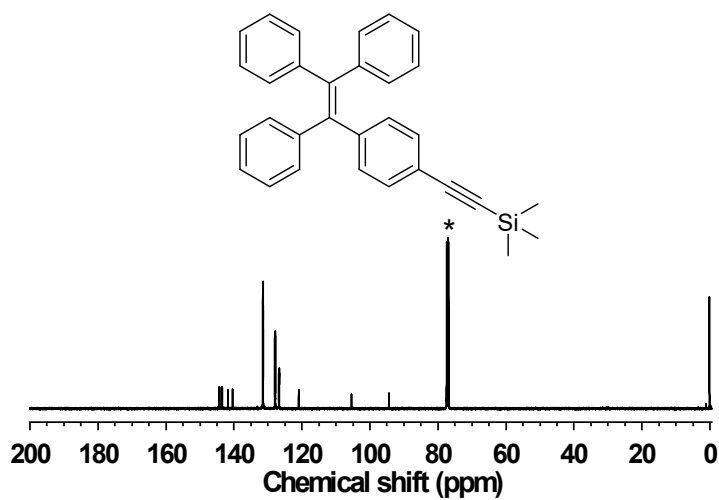

**Fig. S6**  $^{13}\text{C}$  NMR spectra of compound **4** in  $\text{CDCl}_3$ . The solvent peaks are marked with asterisks.

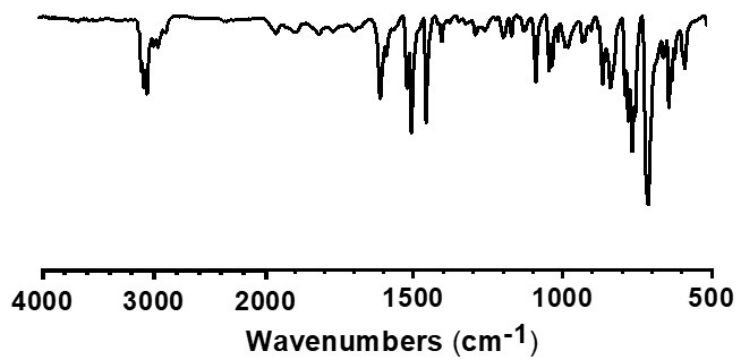

Fig. S7 IR spectra of model compound 5.

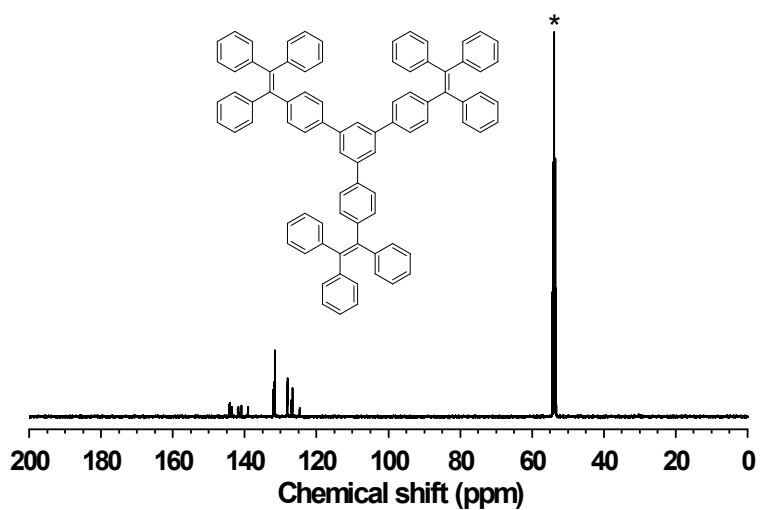

Fig. S8 <sup>13</sup>C NMR spectra of model compound 5 in CD<sub>2</sub>Cl<sub>2</sub> without TMS. The solvent peaks are marked with asterisks.

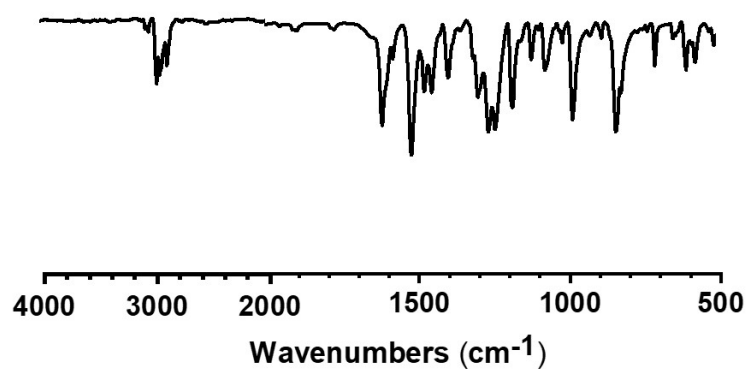

Fig. S9 IR spectra of model compound 8.

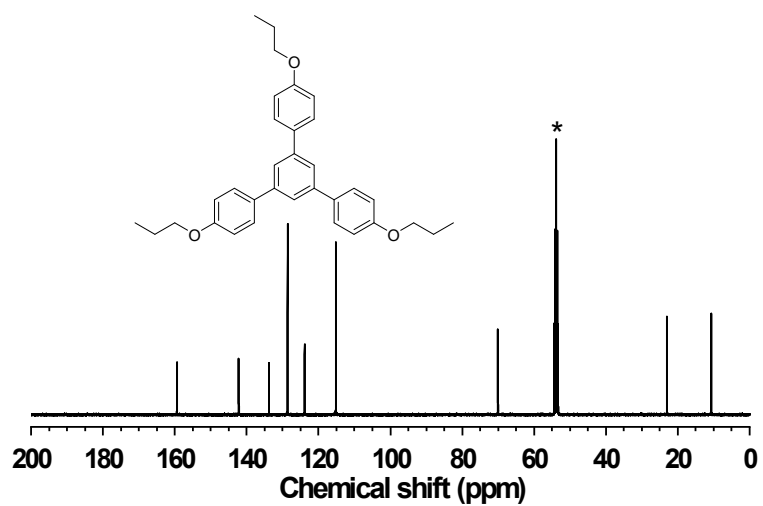

Fig. S10 <sup>13</sup>C NMR spectra of model compound 8 in CD<sub>2</sub>Cl<sub>2</sub> without TMS. The solvent peaks are marked with asterisks.

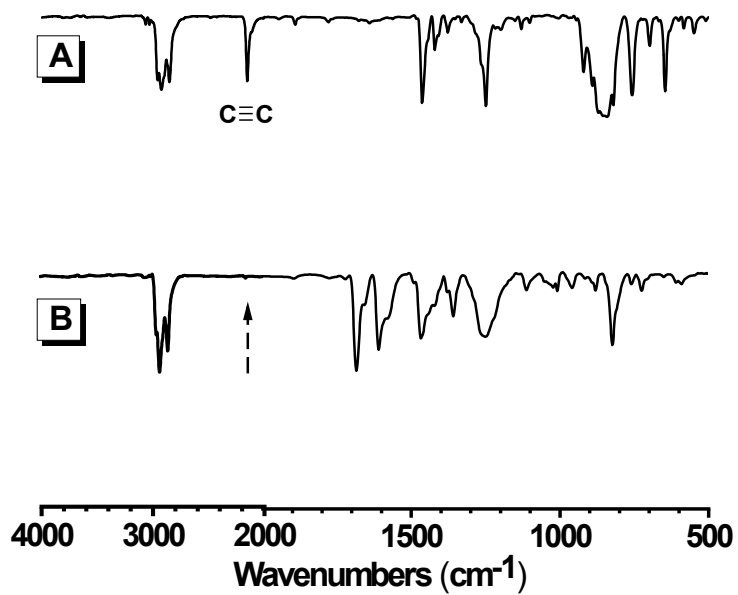

Fig. S11 IR spectra of monomer **1b** (A) and its polymer *hb*-P**1b** (B).

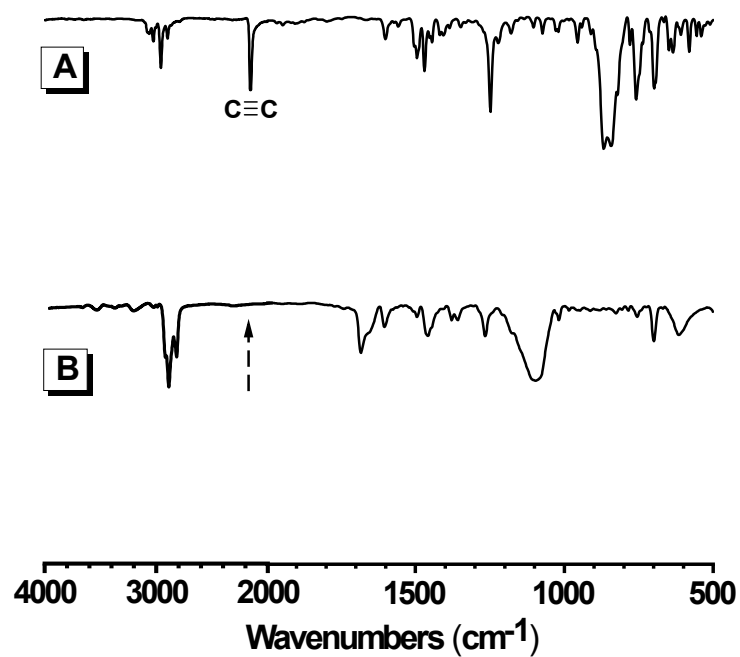

Fig. S12 IR spectra of monomer **1c** (A) and its polymer *hb*-P**1c** (B).



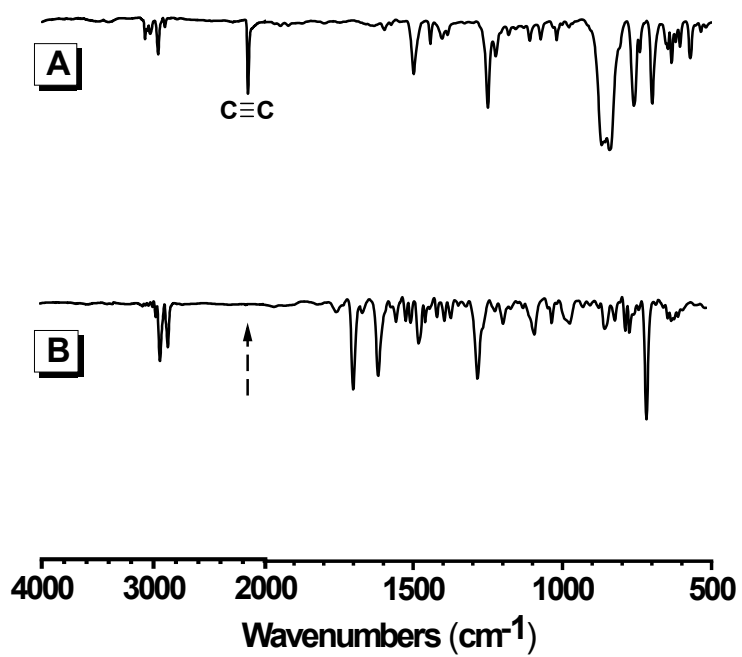

Fig. S13 IR spectra of monomer **1d** (A) and its polymer *hb*-P**1d** (B).

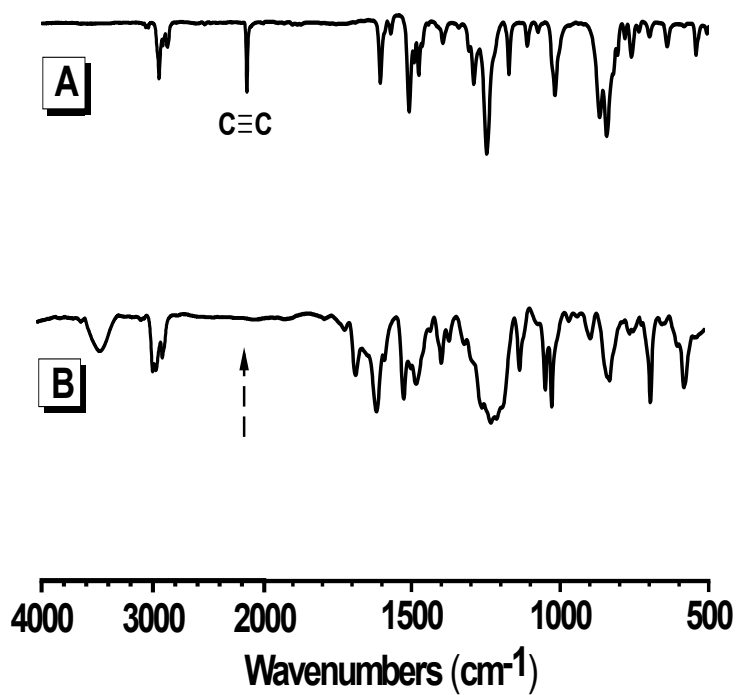

Fig. S14 IR spectra of monomer **1e** (A) and its polymer *hb*-P**1e** (B).

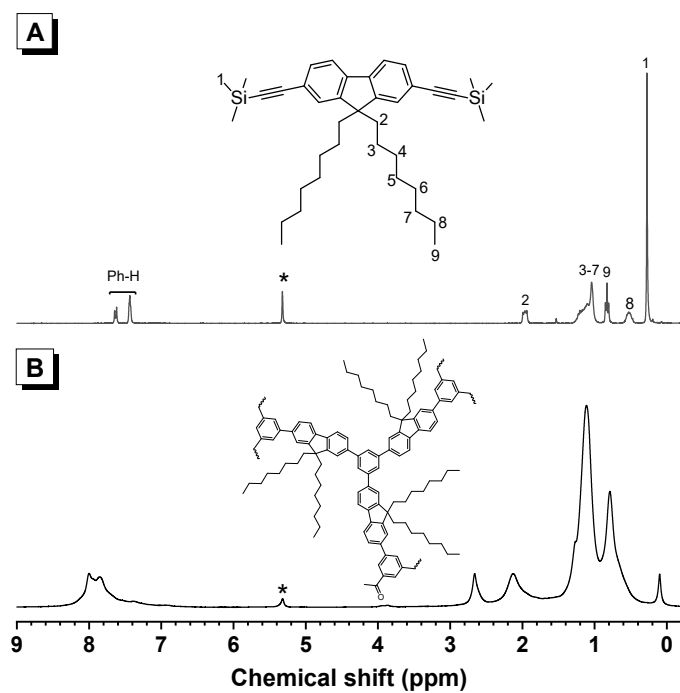

**Fig. S15**  $^1\text{H}$  NMR spectra of monomer **1b** (A) and polymer *hb*-P**1b** (B) in  $\text{CD}_2\text{Cl}_2$  without TMS. The solvent and water peaks are marked with asterisks.

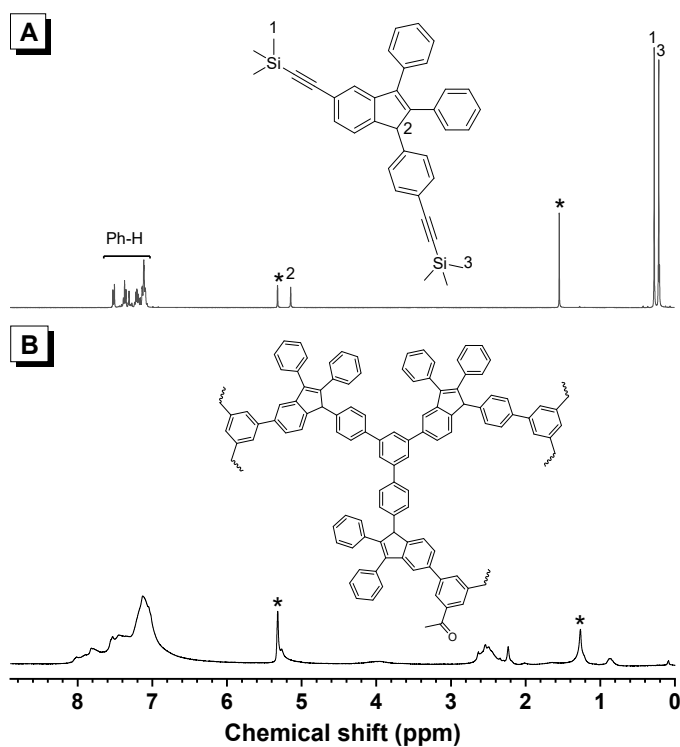

**Fig. S16**  $^1\text{H}$  NMR spectra of monomer **1c** (A) and polymer *hb*-P**1c** (B) in  $\text{CD}_2\text{Cl}_2$  without TMS. The solvent and water peaks are marked with asterisks.

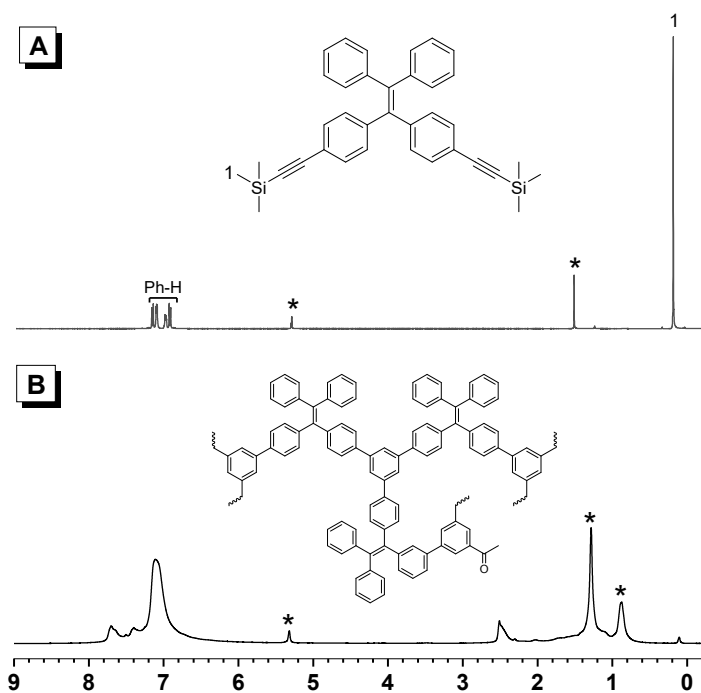

**Fig. S17**  $^1\text{H}$  NMR spectra of monomer **1d** (A) and polymer *hb*-P**1d** (B) in  $\text{CD}_2\text{Cl}_2$  without TMS. The solvent and water peaks are marked with asterisks.

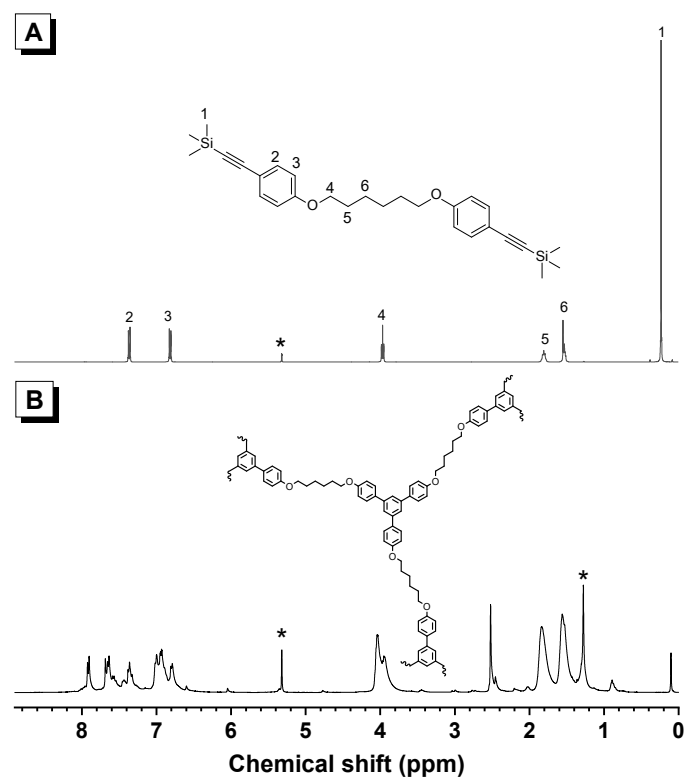

**Fig. S18**  $^1\text{H}$  NMR spectra of monomer **1e** (A) and polymer *hb*-P**1e** (B) in  $\text{CD}_2\text{Cl}_2$  without TMS. The solvent and water peaks are marked with asterisks.

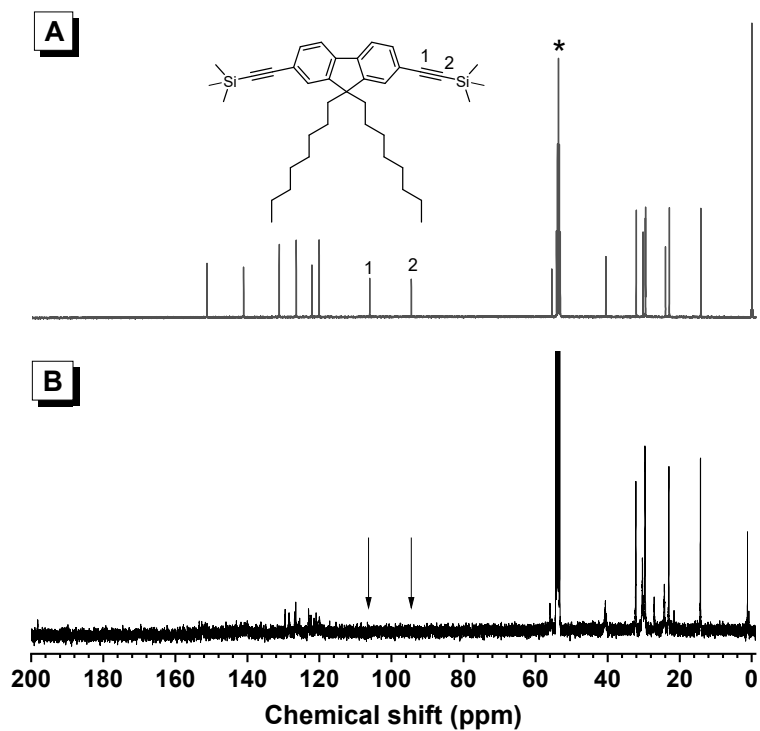

**Fig. S19**  $^{13}\text{C}$  NMR spectra of monomer **1b** (A) and polymer *hb-P1b* (B) in  $\text{CD}_2\text{Cl}_2$  without TMS. The solvent peaks are marked with asterisks.

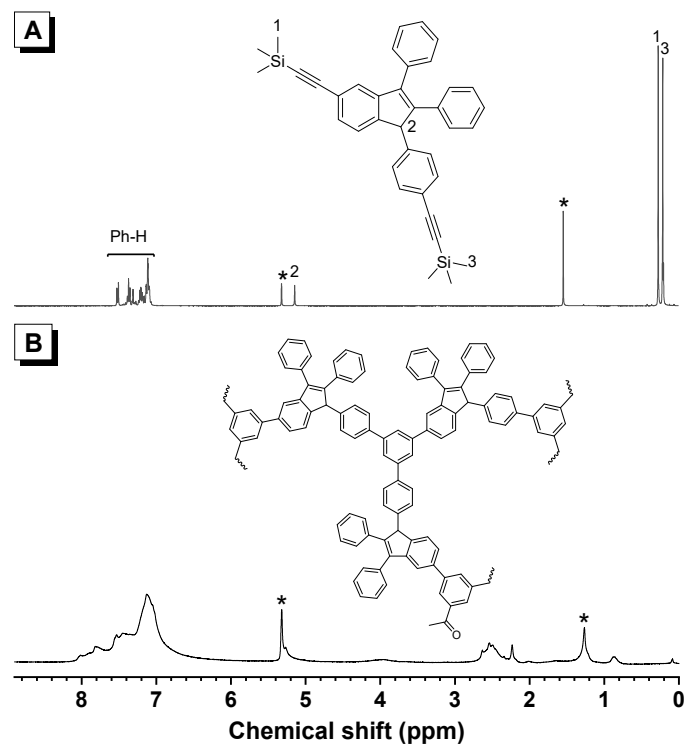

**Fig. S20**  $^{13}\text{C}$  NMR spectra of monomer **1c** (A) and polymer *hb-P1c* (B) in  $\text{CD}_2\text{Cl}_2$  without TMS. The solvent peaks are marked with asterisks.

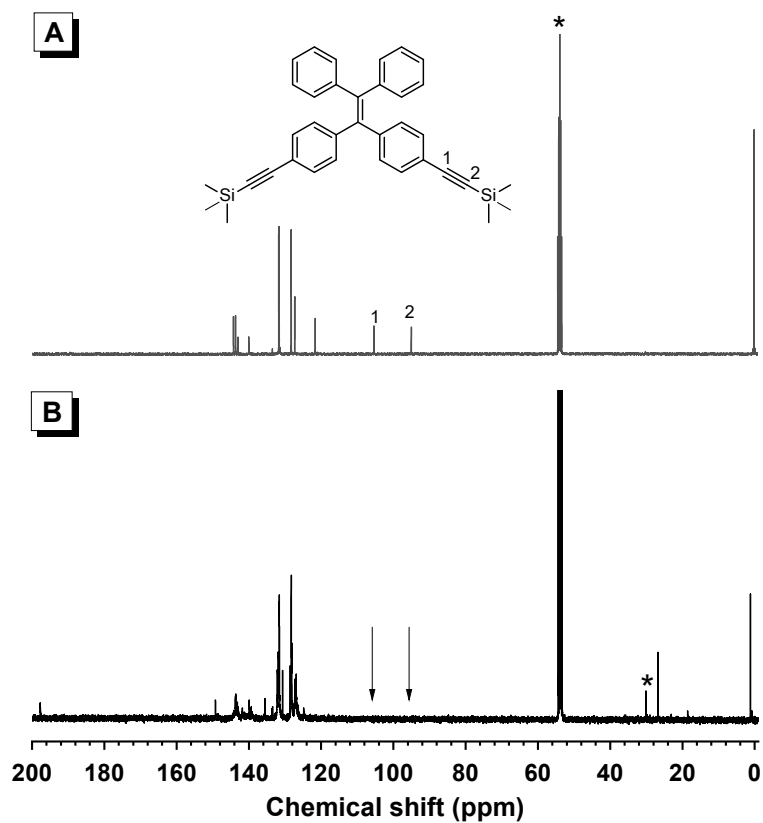

**Fig. S21**  $^{13}\text{C}$  NMR spectra of monomer **1d** (A) and polymer *hb*-P**1d** (B) in  $\text{CD}_2\text{Cl}_2$  without TMS. The solvent peaks are marked with asterisks.

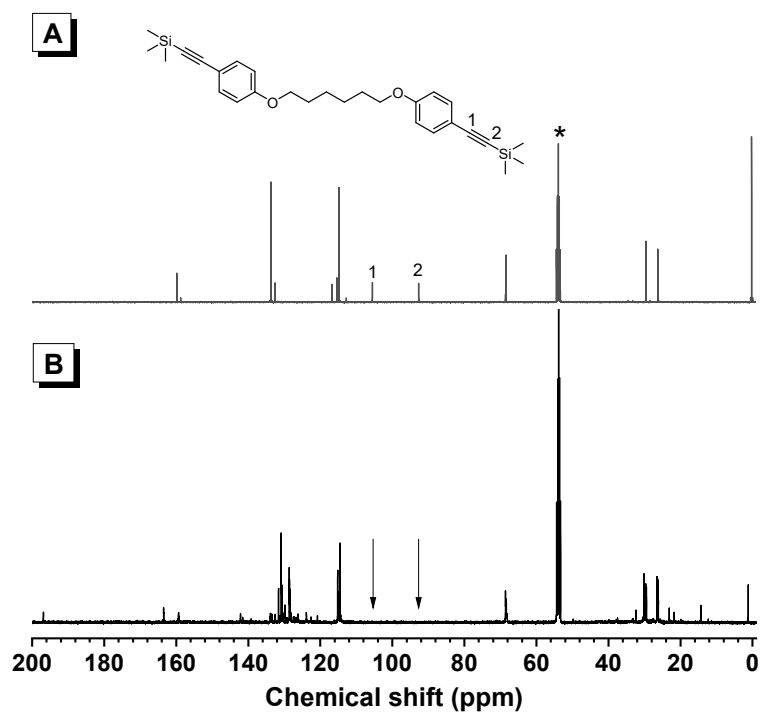

**Fig. S22**  $^{13}\text{C}$  NMR spectra of monomer **1e** (A) and polymer *hb*-P**1e** (B) in  $\text{CD}_2\text{Cl}_2$  without TMS. The solvent peaks are marked with asterisks.
